# Supplementary material
Source: Springer Nature journal article supplement (https://www.springermedizin.de/resource/supplementary/12889_2010_3169_MOESM2_ESM.pdf/9488152)

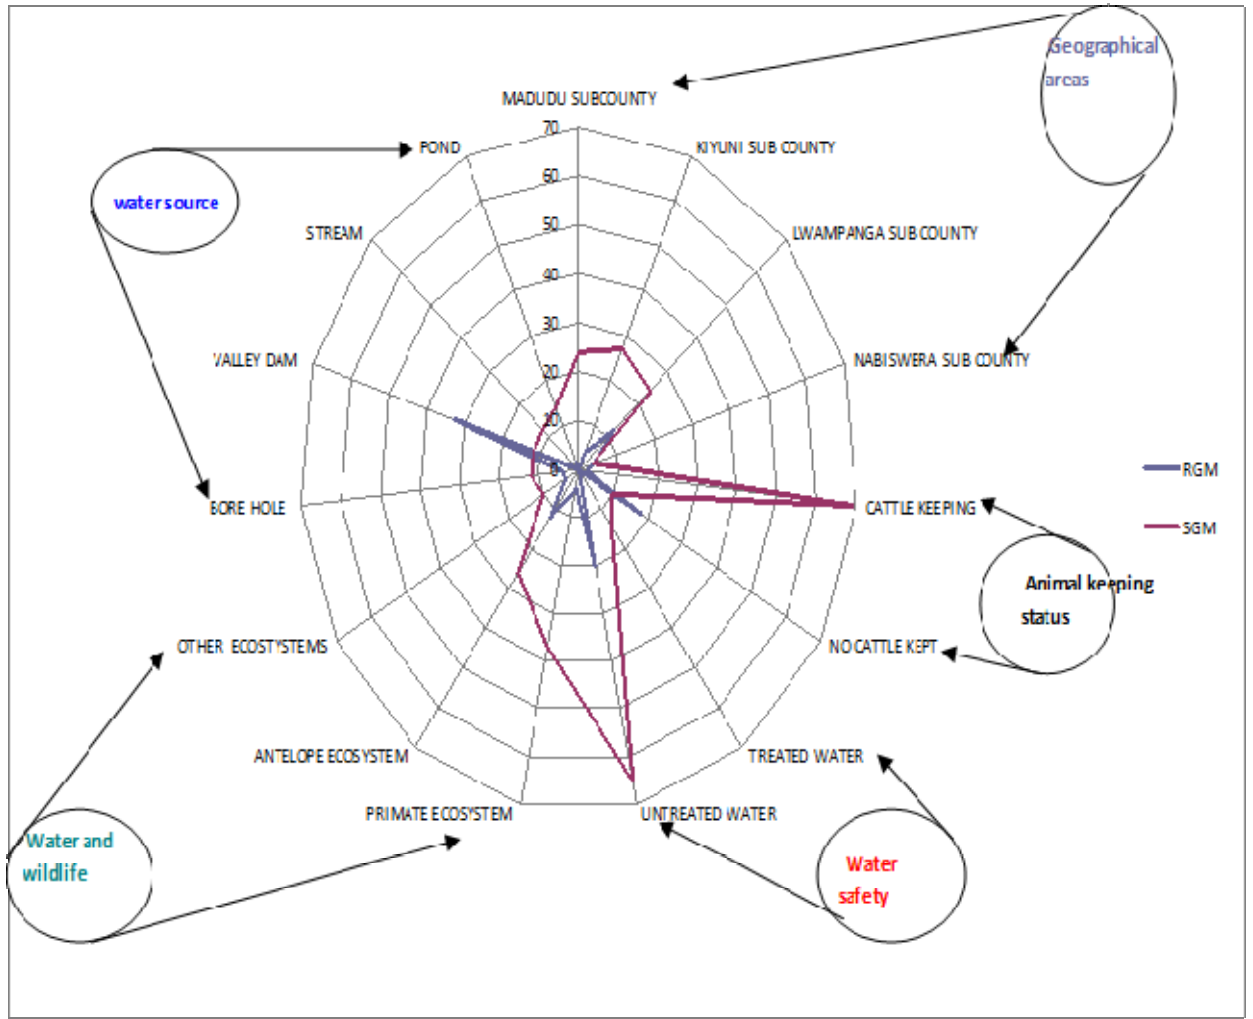

Scale: 0-70 indicates the percentage (%) of factor presence for households positive for SGM or RGM

Supplement: MOESM2 [file 9488152]
